# Supplementary material for: Synthesis and characterisation of ruthenium–nitrosyl complexes in oxygen-rich ligand environments
Source: Royal Society of Chemistry journal article supplement (doi:10.1039/c6dt04717c), 2016-12-22
Supplement: c6dt04717c1.pdf [file c6dt04717c1.pdf]

# Electronic Supplementary Information for

## Synthesis and characterisation of ruthenium-nitrosyl complexes in oxygen-rich ligand environments.

V. Mahesh Krishnan, Hadi D. Arman, and Zachary J. Tonzetich\*

Department of Chemistry, University of Texas at San Antonio, San Antonio, TX 78249

zachary.tonzetich@utsa.edu

---

| Contents                                                                                             | Pages |
|------------------------------------------------------------------------------------------------------|-------|
| <b>Figure S1.</b> Infrared spectrum of <b>1</b> as a thin film.                                      | S2    |
| <b>Figure S2.</b> Infrared spectrum of <b>2</b> as a thin film.                                      | S2    |
| <b>Figure S3.</b> Infrared spectrum of <b>3</b> as a thin film.                                      | S3    |
| <b>Figure S4.</b> Infrared spectrum of <b>4</b> as a thin film.                                      | S3    |
| <b>Figure S5.</b> Electronic absorption spectrum of <b>1</b> in dichloromethane.                     | S4    |
| <b>Figure S6.</b> Electronic absorption spectrum of <b>2</b> in dichloromethane.                     | S4    |
| <b>Figure S7.</b> Electronic absorption spectrum of <b>3</b> in dichloromethane.                     | S5    |
| <b>Figure S8.</b> Electronic absorption spectrum of <b>4</b> in dichloromethane.                     | S5    |
| <b>Figure S9.</b> Infrared spectrum of <b>2+</b> as a thin film.                                     | S6    |
| <b>Figure S10.</b> Electronic absorption spectrum of <b>2+</b> in dichloromethane.                   | S6    |
| <b>Figure S11.</b> <sup>1</sup> H NMR spectrum of <b>2+</b> in acetonitrile- <i>d</i> <sub>3</sub> . |       |
| <b>Figure S12.</b> Electronic absorption spectrum of <b>5+</b> in dichloromethane.                   | S7    |
| <b>Figure S13.</b> <sup>1</sup> H NMR spectrum of <b>5+</b> in chloroform- <i>d</i> .                | S7    |
| <b>Figure S14.</b> Electronic absorption spectrum of <b>5+</b> in dichloromethane.                   | S8    |
| <b>Figure S15.</b> <sup>1</sup> H NMR spectrum of <b>6</b> in chloroform- <i>d</i> .                 | S8    |
| <b>Figure S16.</b> Cyclic voltammograms of <b>1</b> in dichloromethane.                              | S9    |
| <b>Figure S17.</b> Cyclic voltammograms of <b>2</b> in dichloromethane.                              | S9    |
| <b>Figure S18.</b> Cyclic voltammogram of <b>4</b> in dichloromethane.                               | S10   |
| <b>Figure S19.</b> Cyclic voltammograms of <b>5+</b> in dichloromethane.                             | S10   |
| <b>Figure S20.</b> Thermal ellipsoid drawing of <b>1</b> .                                           | S11   |
| <b>Figure S21.</b> Thermal ellipsoid drawing of <b>3</b> .                                           | S12   |
| <b>Figure S22.</b> Thermal ellipsoid drawing of <b>4</b> .                                           | S13   |
| <b>Table S1.</b> Crystallographic data and refinement parameters for <b>1-3</b> .                    | S14   |
| <b>Table S2.</b> Crystallographic data and refinement parameters for <b>4</b> and <b>7</b> .         | S15   |

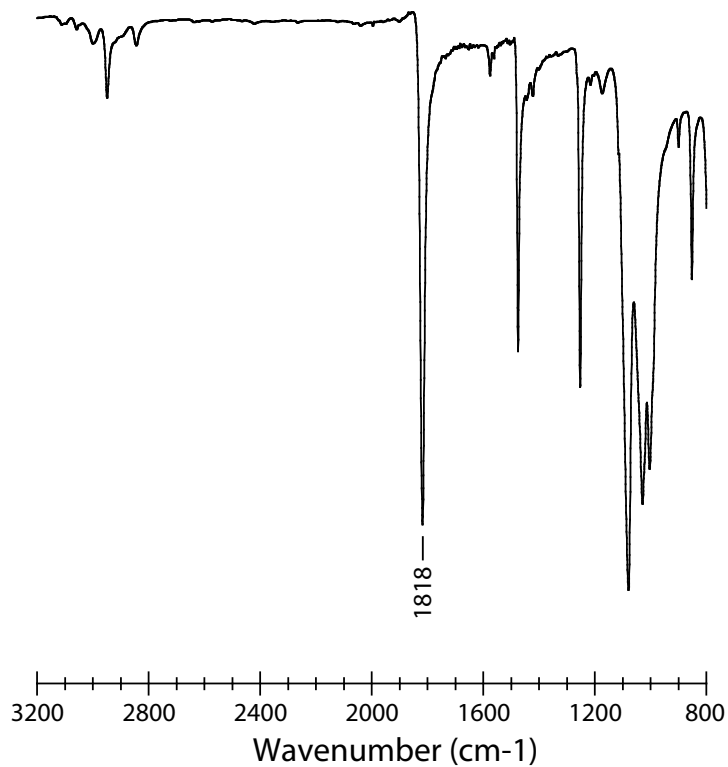

**Figure S1.** Infrared spectrum of  $[\text{Ru}(\text{L}_{\text{OMe}})(\text{NO})(\text{H}_4\text{Cat})]$  (**1**) as a thin film on NaCl.

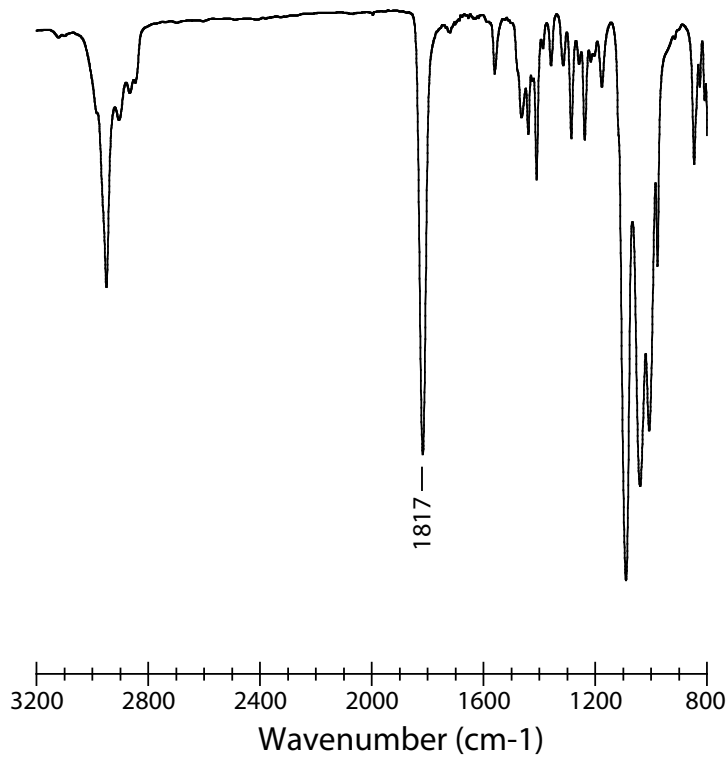

**Figure S2.** Infrared spectrum of  $[\text{Ru}(\text{L}_{\text{OMe}})(\text{NO})(t\text{-Bu}_2\text{Cat})]$  (**2**) as a thin film on NaCl.

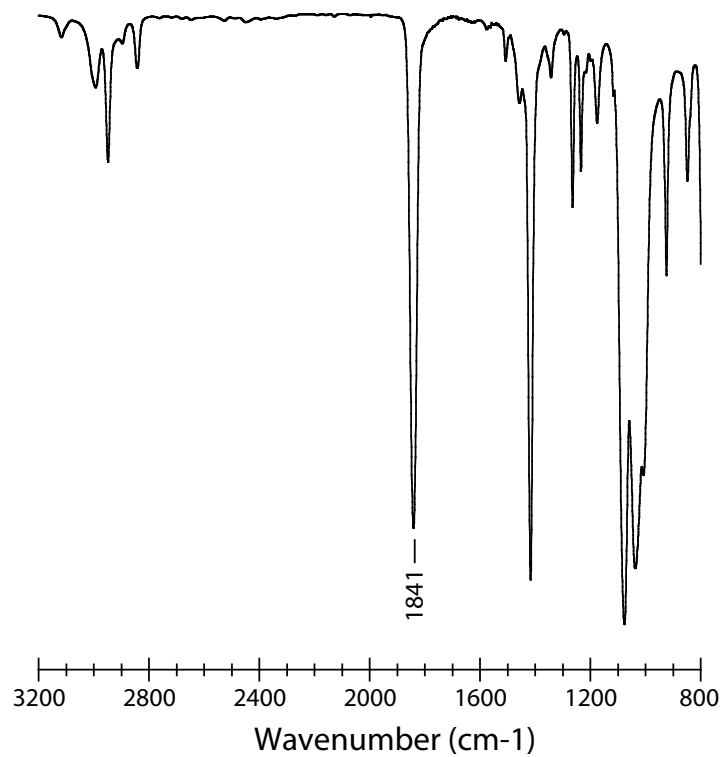

**Figure S3.** Infrared spectrum of  $[\text{Ru}(\text{L}_{\text{OMe}})(\text{NO})(\text{Br}_4\text{Cat})]$  (**3**) as a thin film on NaCl.

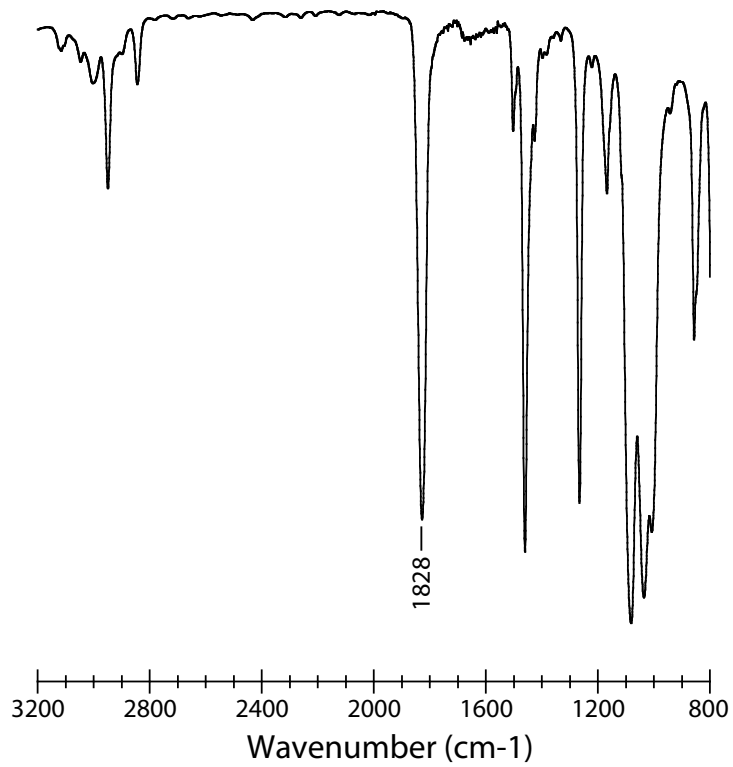

**Figure S4.** Infrared spectrum of  $[\text{Ru}(\text{L}_{\text{OMe}})(\text{NO})(\text{NaphCat})]$  (**4**) as a thin film on NaCl.

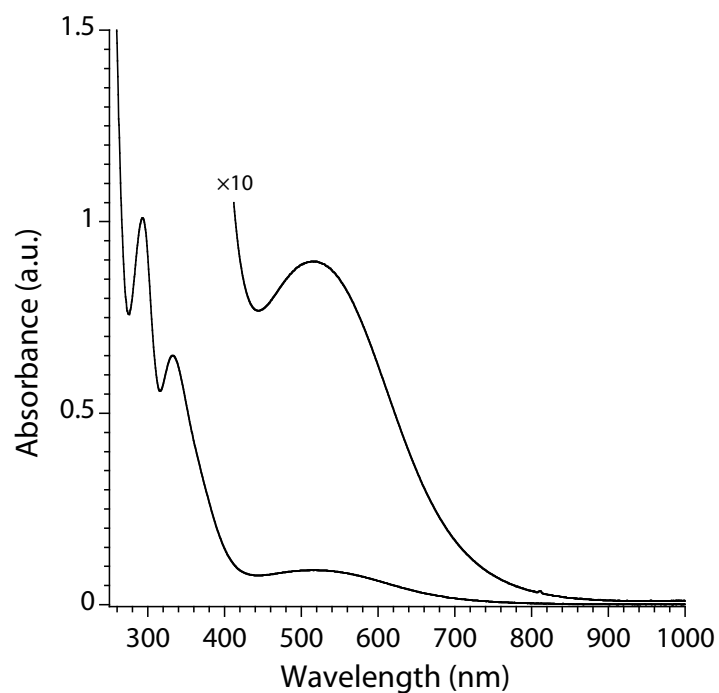

**Figure S5.** Electronic absorption spectrum of [Ru(L<sub>OMe</sub>)(NO)(H<sub>4</sub>Cat)] (**1**) in dichloromethane.

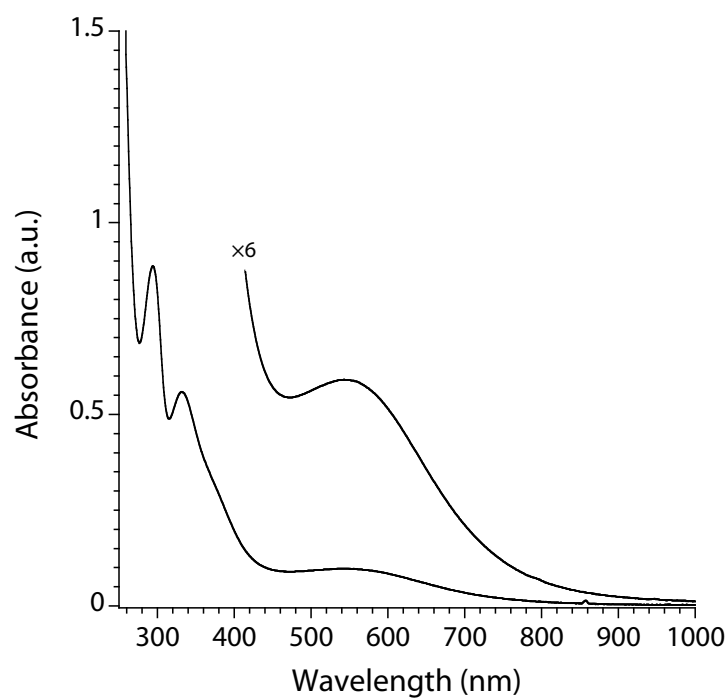

**Figure S6.** Electronic absorption spectrum of [Ru(L<sub>OMe</sub>)(NO)(*t*-Bu<sub>2</sub>Cat)] (**2**) in dichloromethane.

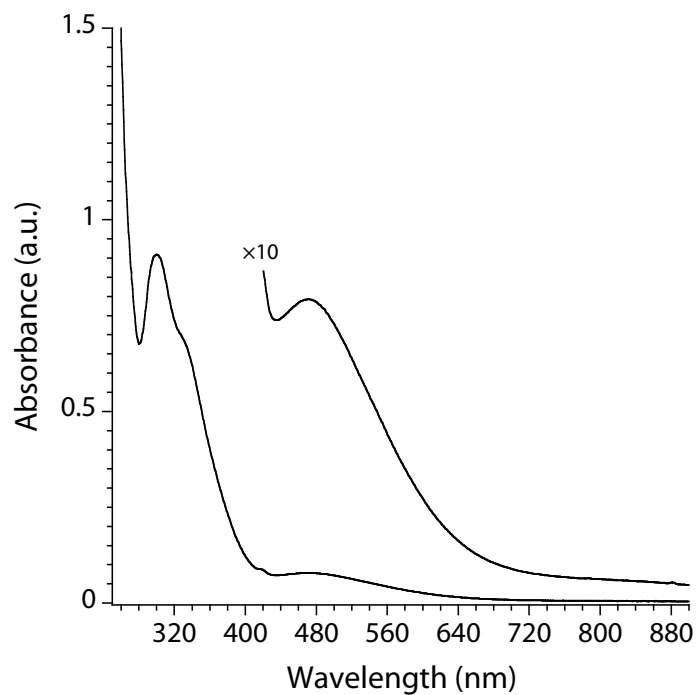

**Figure S7.** Electronic absorption spectrum of [Ru(L<sub>OMe</sub>)(NO)(Br<sub>4</sub>Cat)] (3) in dichloromethane.

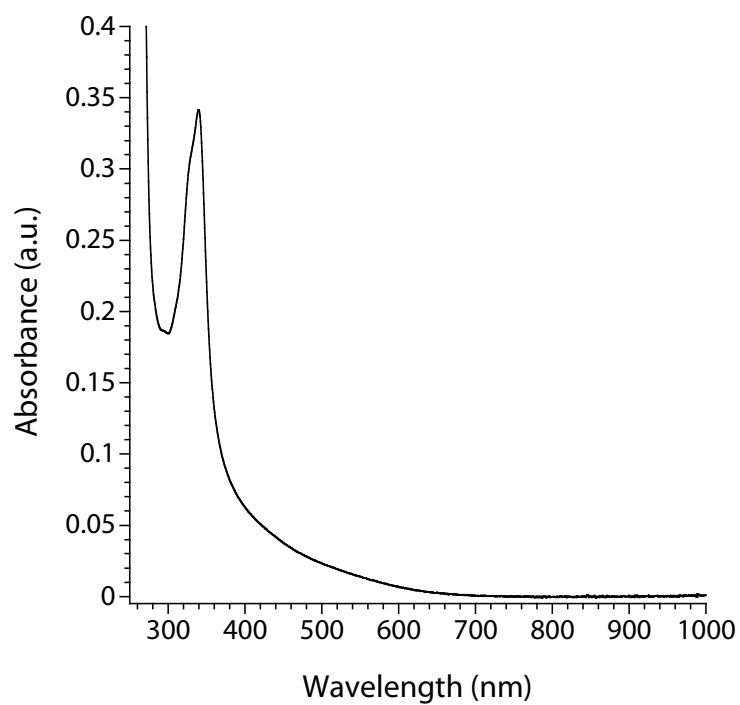

**Figure S8.** Electronic absorption spectrum of [Ru(L<sub>OMe</sub>)(NO)(NaphCat)] (4) in dichloromethane.

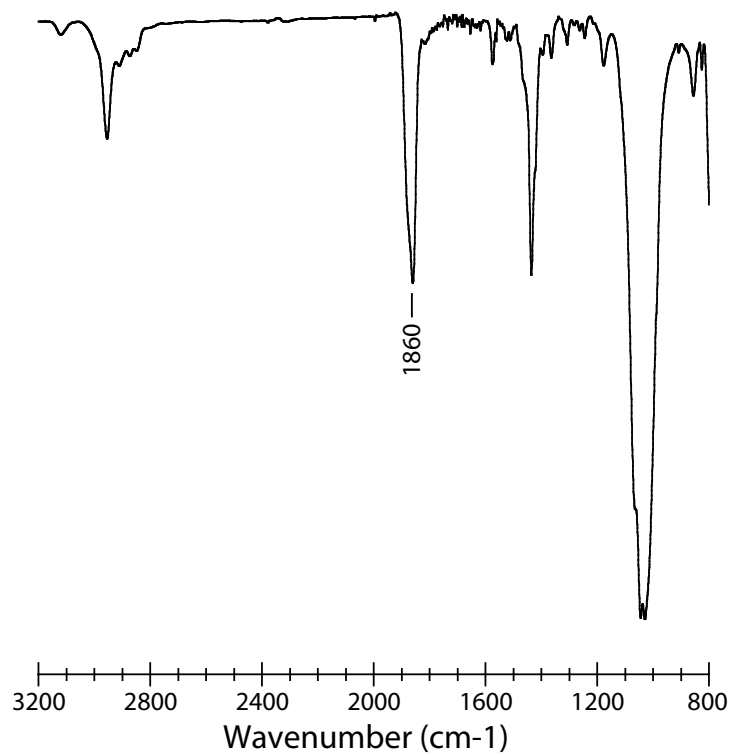

**Figure S9.** Infrared spectrum of  $[\text{Ru}(\text{L}_{\text{OMe}})(\text{NO})(t\text{-Bu}_2\text{cat})](\text{BF}_4)$  ( $2^+$ ) as a thin film on NaCl.

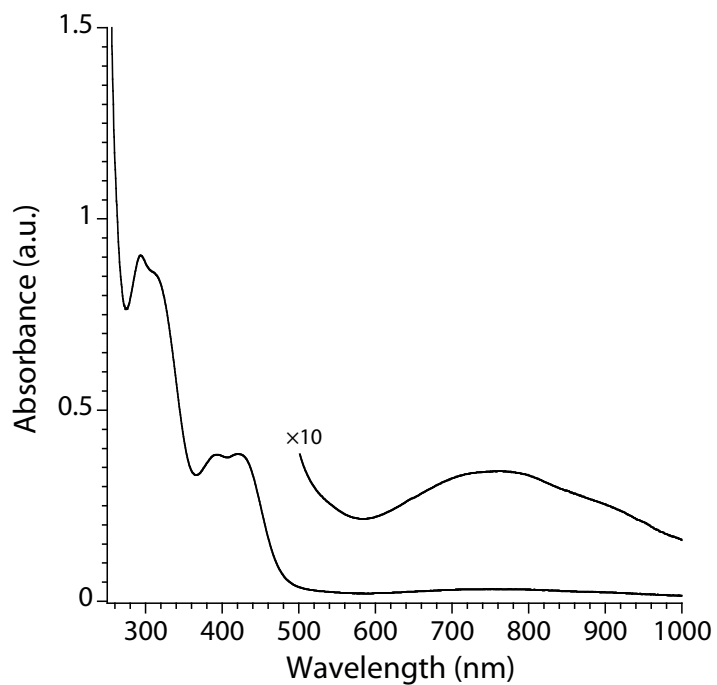

**Figure S10.** Electronic absorption spectrum of  $[\text{Ru}(\text{L}_{\text{OMe}})(\text{NO})(t\text{-Bu}_2\text{cat})](\text{BF}_4)$  ( $2^+$ ) in dichloromethane.

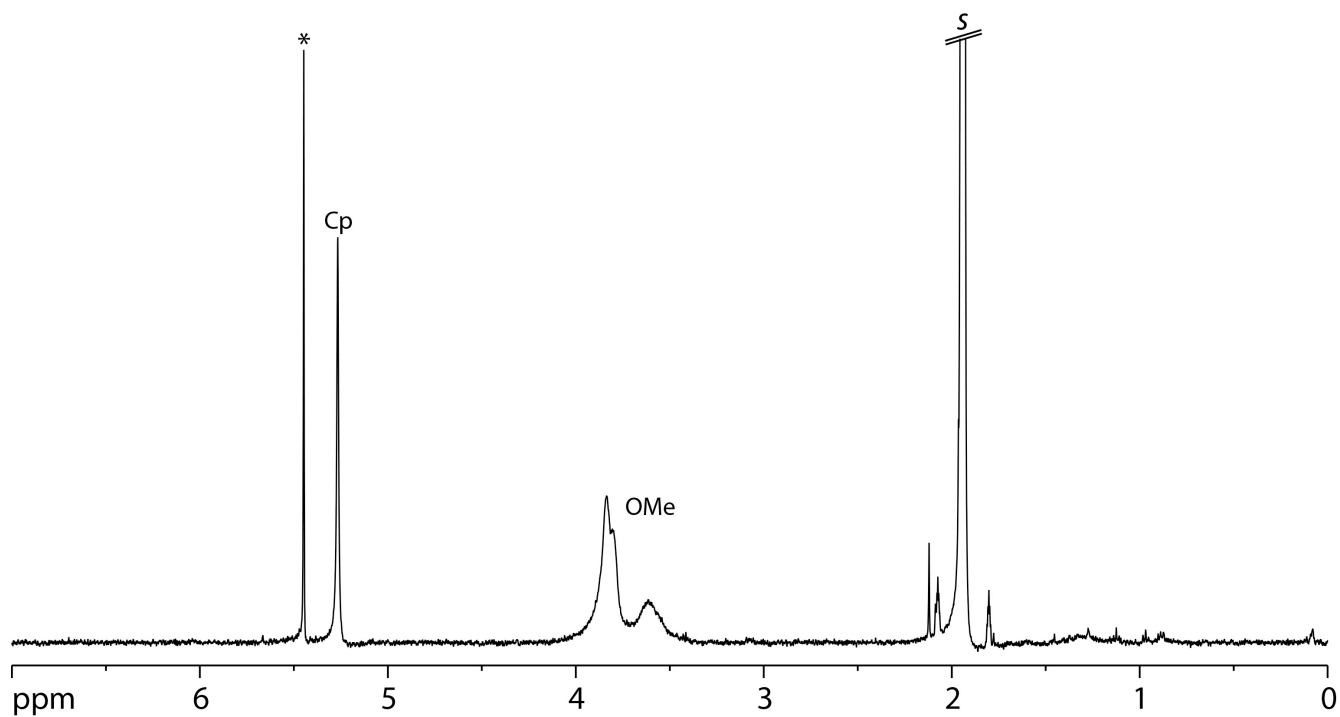

**Figure S11.** 500 MHz  $^1\text{H}$  NMR spectrum of crude  $[\text{Ru}(\text{L}_{\text{OMe}})(\text{NO})(t\text{Bu}_2\text{cat})](\text{BF}_4)$  ( $2^+$ ) in acetonitrile- $d_3$  (s). Asterisk denotes resonance due to residual dichloromethane.

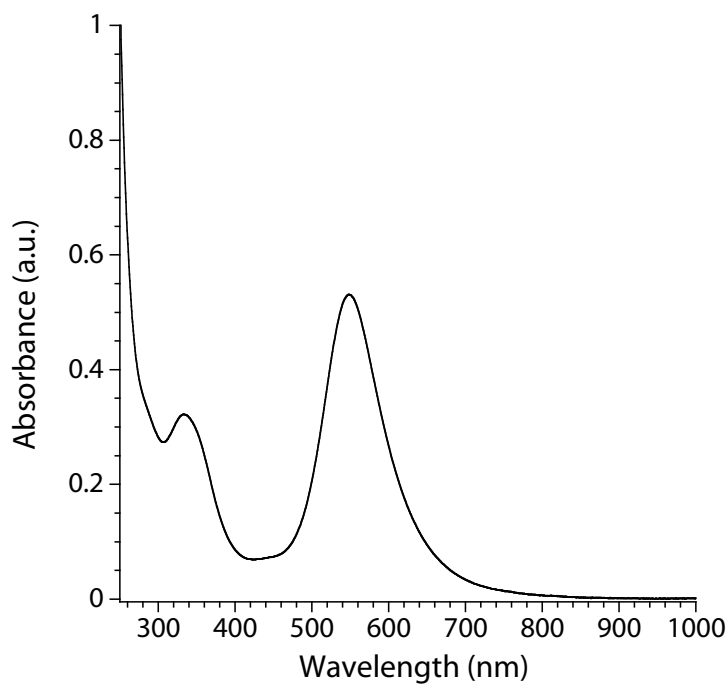

**Figure S12.** Electronic absorption spectrum of  $[\text{Ru}(\text{L}_{\text{OMe}})(\text{NCCH}_3)(t\text{Bu}_2\text{quin})](\text{BF}_4)$  ( $5^+$ ) in dichloromethane obtained by photolysis of  $2^+$  in acetonitrile.

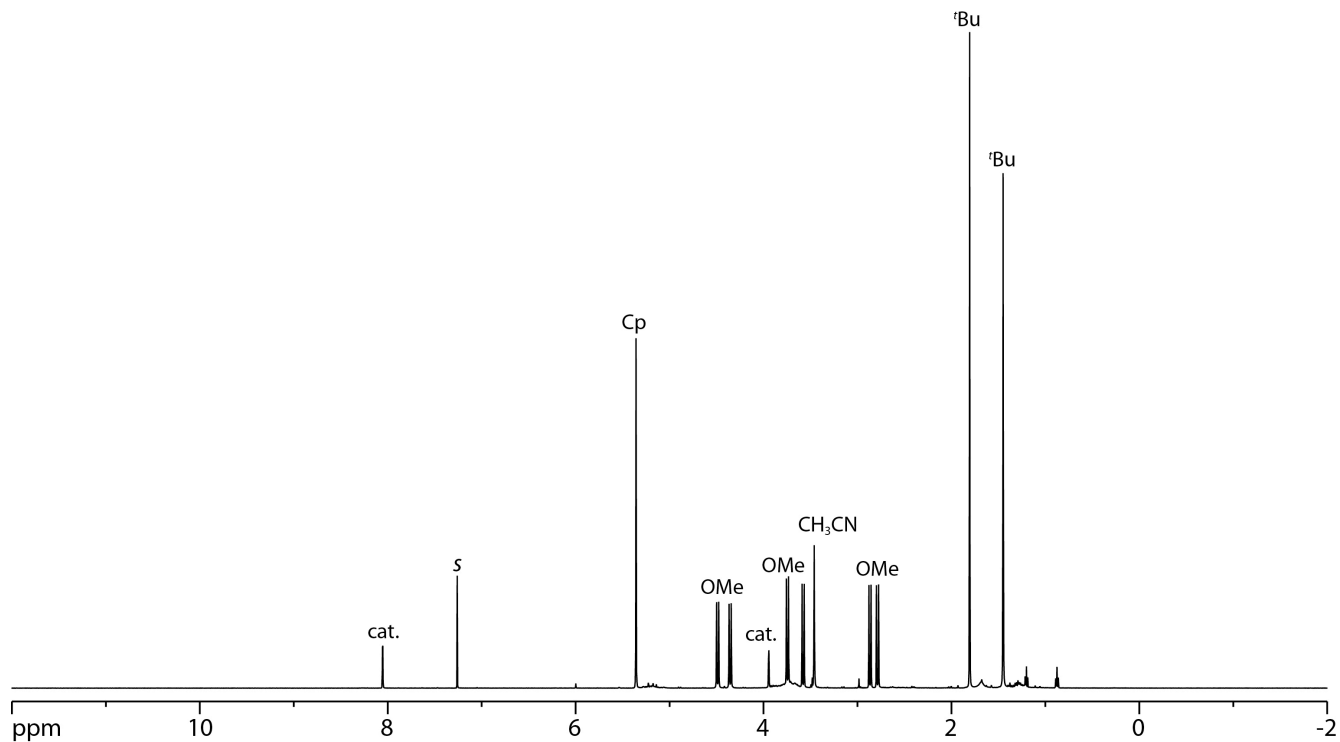

**Figure S13.** 500 MHz  $^1\text{H}$  NMR spectrum ( $\text{CDCl}_3$ ) of  $[\text{Ru}(\text{L}_{\text{OMe}})(\text{NCCH}_3)(\text{Bu}_2\text{quin})](\text{BF}_4)$  ( $5^+$ ) obtained by photolysis of  $2^+$  in acetonitrile.

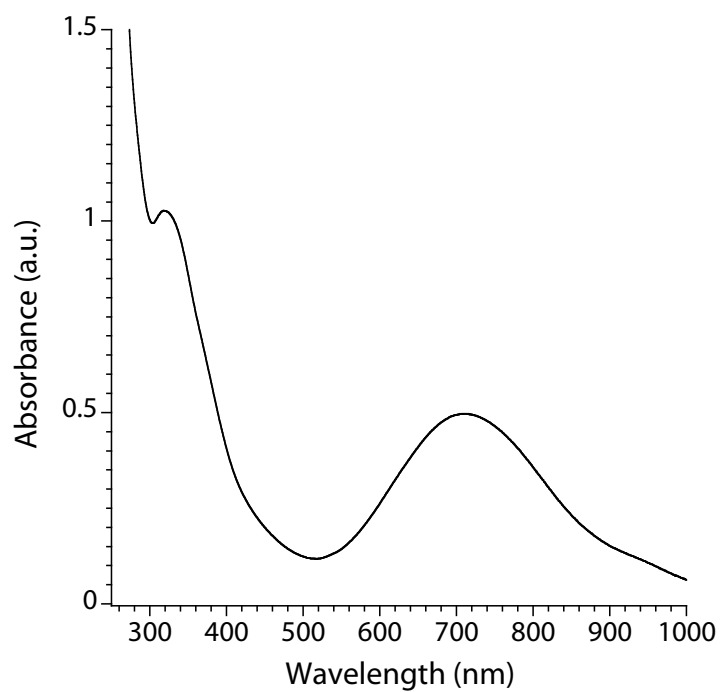

**Figure S14.** Electronic absorption spectrum of  $[\text{Ru}(\text{L}_{\text{OMe}})(\text{NCCH}_3)(\text{Br}_4\text{cat})]$  ( $6$ ) in dichloromethane.



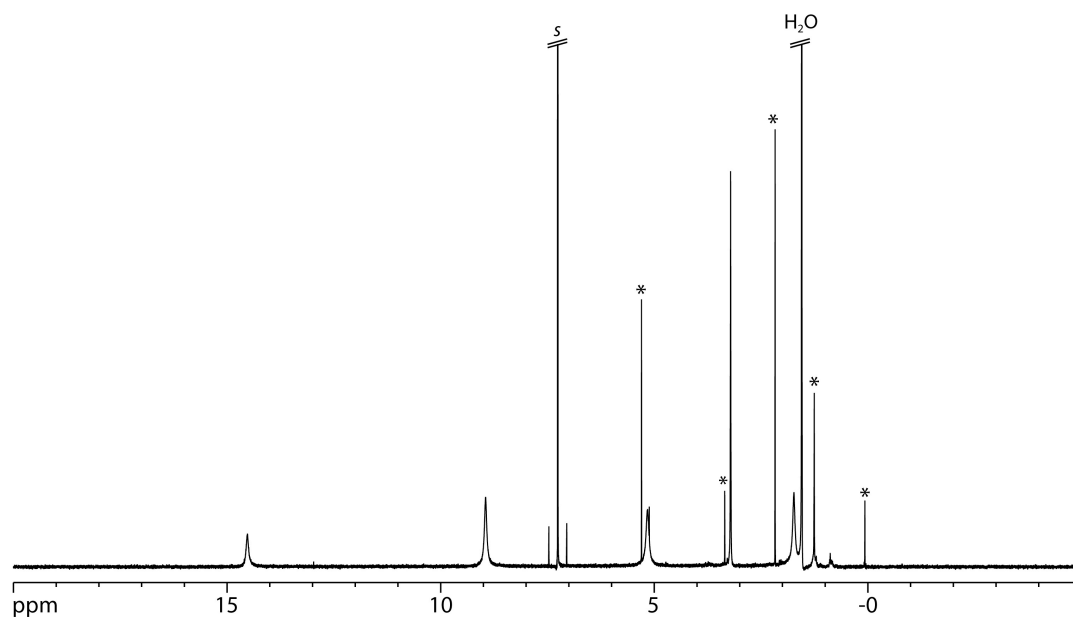

**Figure S15.** 500 MHz  $^1\text{H}$  NMR spectrum ( $\text{CDCl}_3$ ) of  $[\text{Ru}(\text{L}_{\text{OMe}})(\text{NCCH}_3)(\text{Br}_4\text{cat})]$  (**6**) obtained by photolysis of **3** in a mixture of dichloroethane and acetonitrile. Asterisks denote resonances due to residual dichloromethane, dichloroethane, acetone and grease.

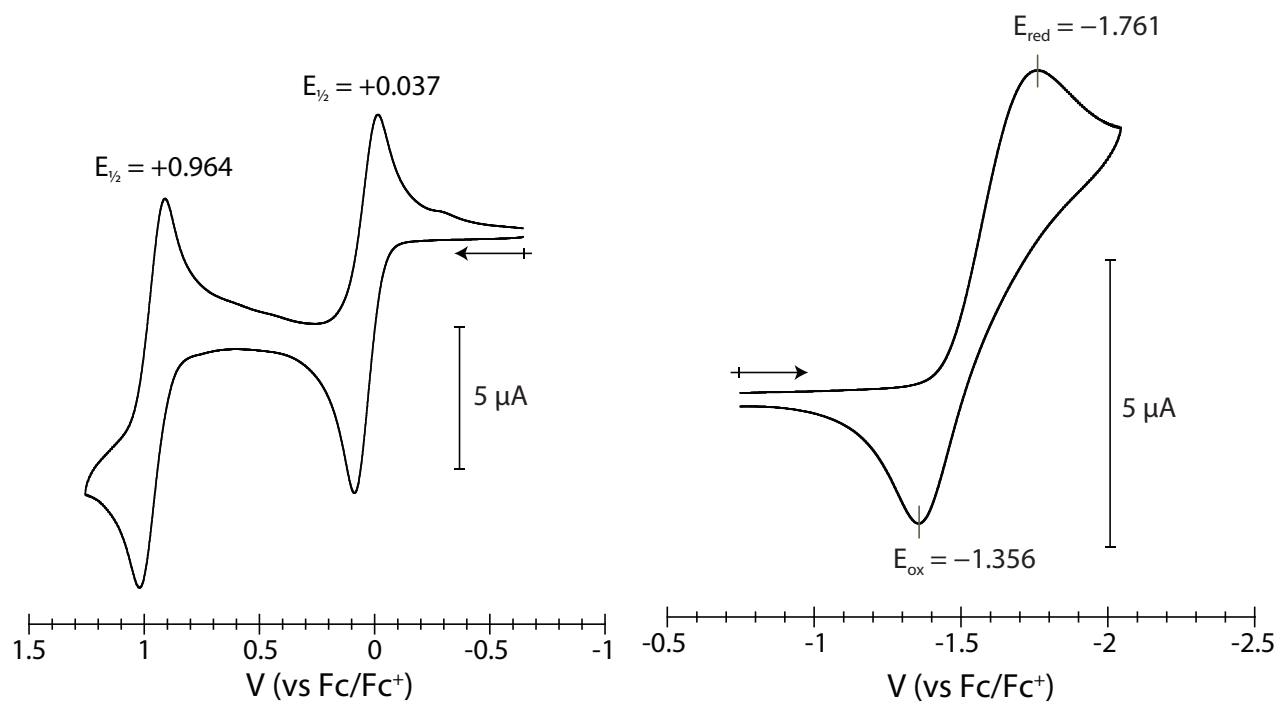

**Figure S16.** Anodic (left) and cathodic (right) portions of the cyclic voltammogram of  $[\text{Ru}(\text{L}_{\text{OMe}})(\text{NO})(\text{H}_4\text{cat})]$  (**1**) at a Pt electrode in dichloromethane. The scan rate is 50 mV/s and the supporting electrolyte is 0.1 M  $\text{Bu}_4\text{NPF}_6$ .

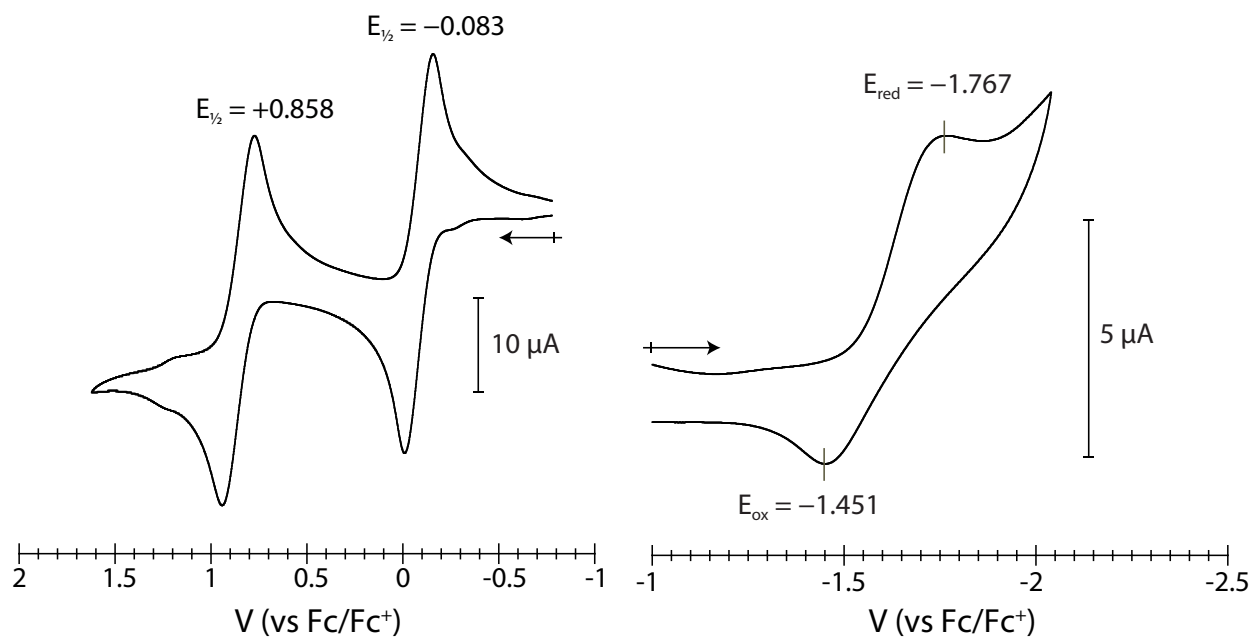

**Figure S17.** Anodic (left) and cathodic (right) portions of the cyclic voltammogram of  $[\text{Ru}(\text{L}_{\text{OMe}})(\text{NO})(\text{Bu}_2\text{cat})]$  (**2**) at a Pt electrode in dichloromethane. The scan rate is 50 mV/s and the supporting electrolyte is 0.1 M  $\text{Bu}_4\text{NPF}_6$ .

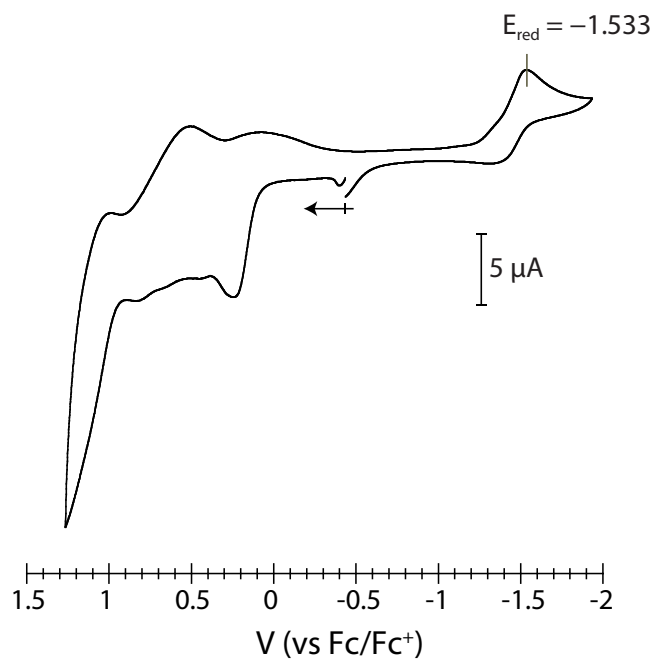

**Figure S18.** Cyclic voltammogram of  $[\text{Ru}(\text{L}_{\text{OMe}})(\text{NO})(\text{Naphcat})]$  (**4**) at a Pt electrode in dichloromethane. The scan rate is 50 mV/s and the supporting electrolyte is 0.1 M  $\text{Bu}_4\text{NPF}_6$ .

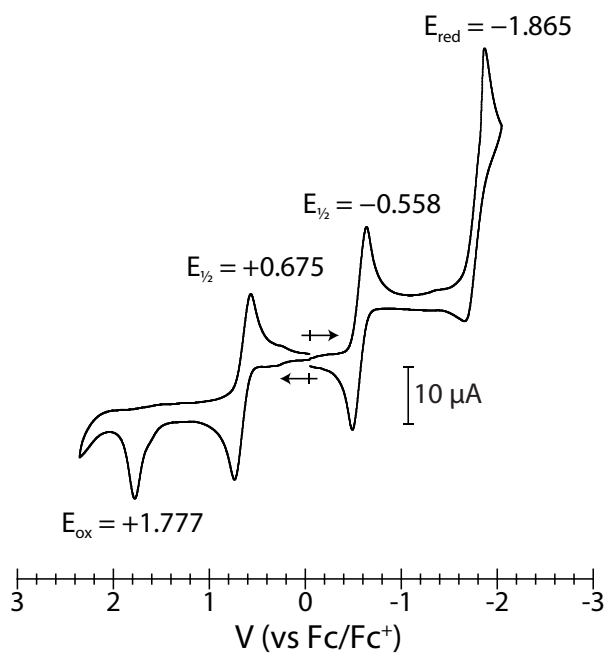

**Figure S19.** Cyclic voltammograms of  $[\text{Ru}(\text{L}_{\text{OMe}})(\text{CH}_3\text{CN})(\text{Bu}_2\text{quin})](\text{BF}_4)$  (**5+**) at a Pt electrode in dichloromethane. The scan rate is  $50 \text{ mV/s}$  and the supporting electrolyte is  $0.1 \text{ M Bu}_4\text{NPF}_6$ .

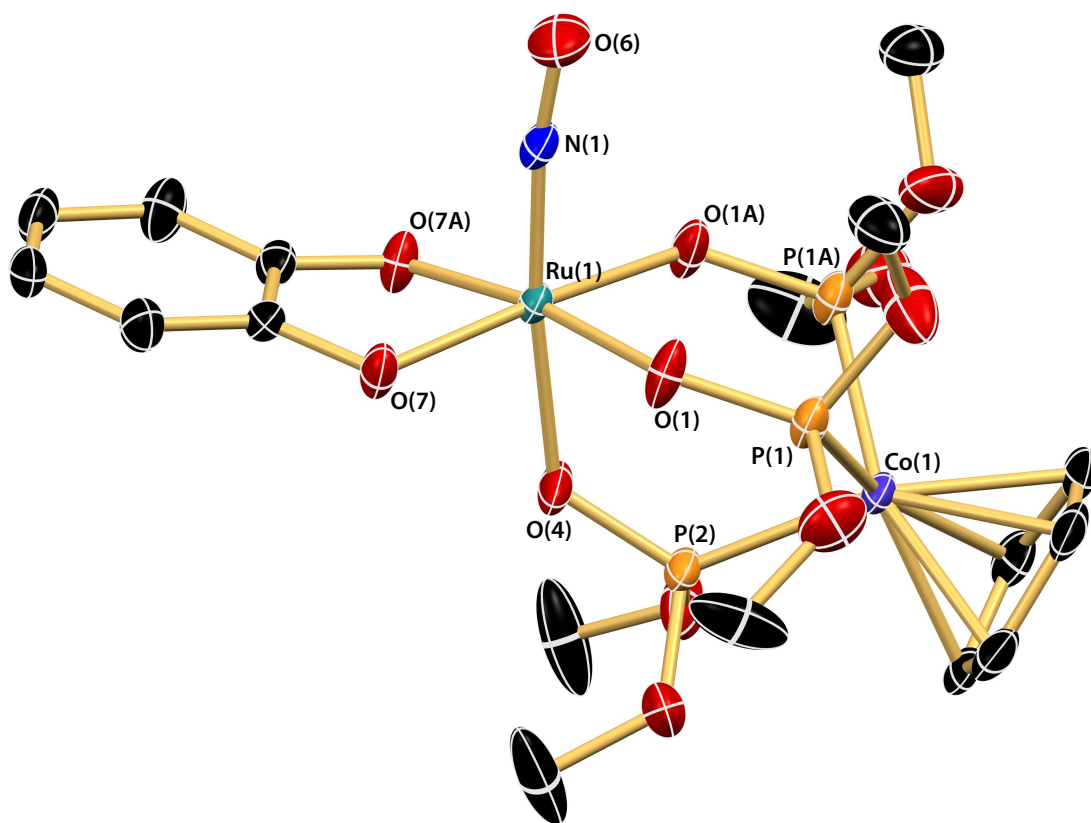

**Figure S20.** Thermal ellipsoid rendering (50%) of  $[\text{Ru}(\text{L}_{\text{OMe}})(\text{NO})(\text{H}_4\text{cat})]$  (**1**). Hydrogen atoms omitted for clarity. Selected bond distances ( $\text{\AA}$ ) and angles (deg):  $\text{Ru}(1)\text{-N}(1) = 1.720(5)$ ;  $\text{Ru}(1)\text{-O}(7) = 1.986(3)$ ;  $\text{Ru}(1)\text{-O}(\text{avg}) = 2.062(4)$ ;  $\text{N}(1)\text{-O}(12) = 1.166(7)$ ;  $\text{Ru}(1)\text{-N}(1)\text{-O}(12) = 171.4(4)$ .

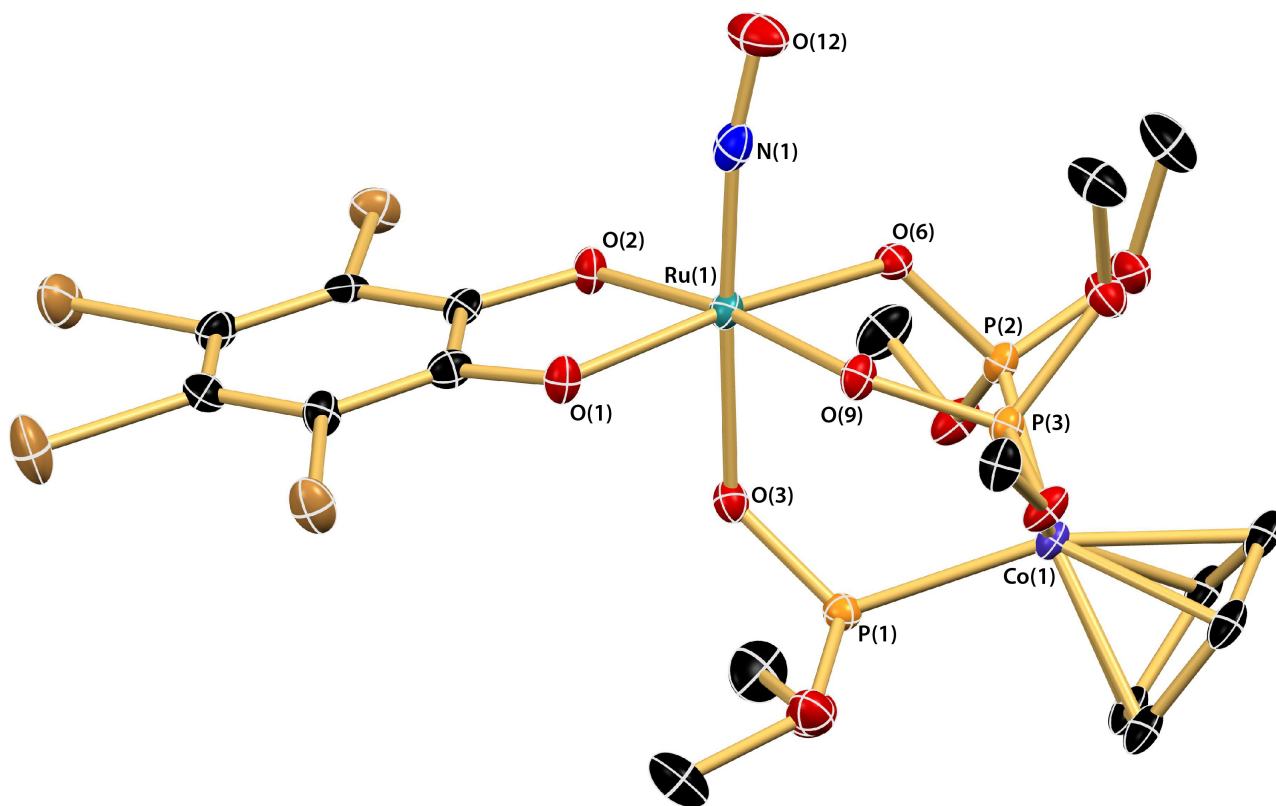

**Figure S21.** Thermal ellipsoid rendering (50%) of one of the two crystallographically independent molecules of  $[\text{Ru}(\text{L}_{\text{OMe}})(\text{NO})(\text{Br}_4\text{cat})]$  (**3**) in the asymmetric unit. Hydrogen atoms omitted for clarity. Selected bond distances ( $\text{\AA}$ ) and angles (deg):  $\text{Ru}(1)\text{-N}(1) = 1.721(6)$ ;  $\text{Ru}(1)\text{-O}(1) = 2.018(4)$ ;  $\text{Ru}(1)\text{-O}(2) = 2.012(4)$ ;  $\text{Ru}(1)\text{-O}(\text{avg}) = 2.073(4)$ ;  $\text{N}(1)\text{-O}(12) = 1.188(7)$ ;  $\text{Ru}(1)\text{-N}(1)\text{-O}(12) = 170.2(5)$ .

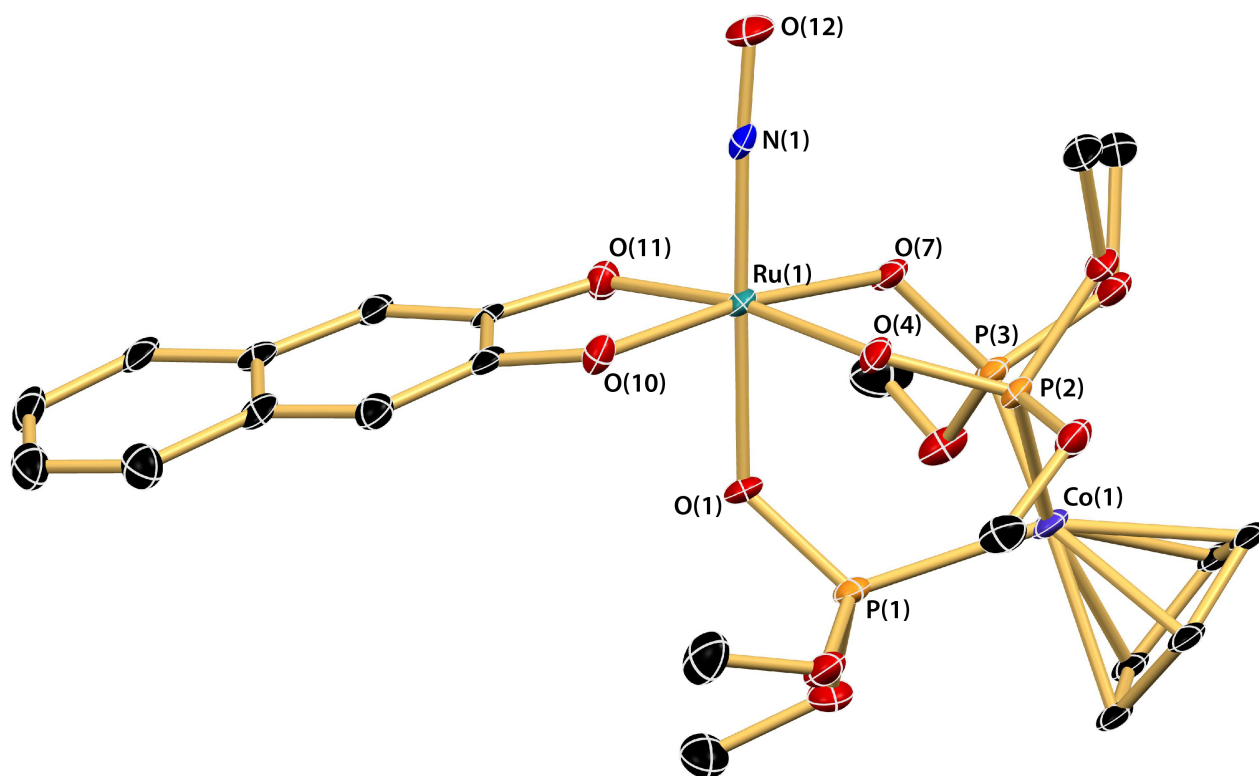

**Figure S22.** Thermal ellipsoid rendering (50%) of  $[\text{Ru}(\text{L}_{\text{OMe}})(\text{NO})(\text{Naphcat})]$  (**4**). Hydrogen atoms omitted for clarity. Selected bond distances ( $\text{\AA}$ ) and angles (deg):  $\text{Ru}(1)\text{-N}(1) = 1.720(3)$ ;  $\text{Ru}(1)\text{-O}(10) = 1.980(3)$ ;  $\text{Ru}(1)\text{-O}(11) = 1.982(3)$ ;  $\text{Ru}(1)\text{-O}(\text{avg}) = 2.063(3)$ ;  $\text{N}(1)\text{-O}(12) = 1.162(4)$ ;  $\text{Ru}(1)\text{-N}(1)\text{-O}(12) = 176.2(3)$ .

**Table S1.** Crystallographic data and refinement parameters for compounds **1-3**.<sup>‡</sup>

| <b>Compound</b>                                                  | <b>1</b>                                                                           | <b>2</b>                                                                           | <b>3<sup>§</sup></b>                                                                 |
|------------------------------------------------------------------|------------------------------------------------------------------------------------|------------------------------------------------------------------------------------|--------------------------------------------------------------------------------------|
| Empirical formula                                                | C <sub>17</sub> H <sub>27</sub> NC <sub>12</sub> O <sub>12</sub> P <sub>3</sub> Ru | C <sub>25</sub> H <sub>43</sub> NC <sub>12</sub> O <sub>12</sub> P <sub>3</sub> Ru | C <sub>17</sub> H <sub>23</sub> NBr <sub>4</sub> CoO <sub>12</sub> P <sub>3</sub> Ru |
| Formula weight (g/mol)                                           | 690.31                                                                             | 802.54                                                                             | 1005.91                                                                              |
| Temperature (K)                                                  | 98(2)                                                                              | 98(2)                                                                              | 98(2)                                                                                |
| Crystal system,<br>space group                                   | Orthorhombic<br><i>Pnma</i>                                                        | Orthorhombic<br><i>Pbca</i>                                                        | Orthorhombic<br><i>Pca</i> 2 <sub>1</sub>                                            |
| Unit cell dimensions<br>(Å, deg)                                 | <i>a</i> = 16.740(3)<br><i>b</i> = 11.664(2)<br><i>c</i> = 12.351(2)               | <i>a</i> = 16.170(3)<br><i>b</i> = 17.167(3)<br><i>c</i> = 24.094(4)               | <i>a</i> = 24.071(3)<br><i>b</i> = 14.2382(17)<br><i>c</i> = 17.677(2)               |
| Volume (Å <sup>3</sup> )                                         | 2411.6(7)                                                                          | 6688(2)                                                                            | 6058.5(13)                                                                           |
| Z                                                                | 4                                                                                  | 8                                                                                  | 8                                                                                    |
| Calculated density<br>(g/cm <sup>3</sup> )                       | 1.901                                                                              | 1.594                                                                              | 2.206                                                                                |
| Absorption coefficient<br>(mm <sup>-1</sup> )                    | 1.576                                                                              | 1.149                                                                              | 6.536                                                                                |
| F(000)                                                           | 1392                                                                               | 3296                                                                               | 3872                                                                                 |
| Crystal size (mm)                                                | 0.16 × 0.06 × 0.02                                                                 | 0.33 × 0.30 × 0.10                                                                 | 0.30 × 0.23 × 0.13                                                                   |
| Θ range                                                          | 2.40 to 27.50°                                                                     | 3.03 to 25.50°                                                                     | 2.98 to 27.43°                                                                       |
| Limiting indices                                                 | -21 ≤ <i>h</i> ≤ 21,<br>-15 ≤ <i>k</i> ≤ 11,<br>-16 ≤ <i>l</i> ≤ 16                | -19 ≤ <i>h</i> ≤ 19,<br>-20 ≤ <i>k</i> ≤ 20,<br>-29 ≤ <i>l</i> ≤ 27                | -30 ≤ <i>h</i> ≤ 30,<br>-18 ≤ <i>k</i> ≤ 18,<br>-22 ≤ <i>l</i> ≤ 21                  |
| Reflections collected /<br>unique                                | 17093 / 2896<br>[R <sub>int</sub> = 0.0628]                                        | 42240 / 6203<br>[R <sub>int</sub> = 0.0661]                                        | 45644 / 12832<br>[R <sub>int</sub> = 0.0485]                                         |
| Completeness to Θ                                                | 99.9%                                                                              | 99.7%                                                                              | 99.8%                                                                                |
| Absorption correction                                            | multi-scan ABSCOR                                                                  | multi-scan ABSCOR                                                                  | multi-scan ABSCOR                                                                    |
| Min. and max<br>transmission                                     | 0.749 and 1.000                                                                    | 0.449 and 1.000                                                                    | 0.594 and 1.000                                                                      |
| Data / restraints /<br>parameters                                | 2896 / 0 / 169                                                                     | 6203 / 0 / 400                                                                     | 12832 / 1 / 692                                                                      |
| Goodness-of-fit on F <sup>2</sup>                                | 1.013                                                                              | 1.047                                                                              | 1.060                                                                                |
| Final R indices<br>[I > 2σ(I)]                                   | R <sub>1</sub> = 0.0454,<br>wR <sub>2</sub> = 0.1228                               | R <sub>1</sub> = 0.0432,<br>wR <sub>2</sub> = 0.1091                               | R <sub>1</sub> = 0.0308,<br>wR <sub>2</sub> = 0.0557                                 |
| R indices (all data)                                             | R <sub>1</sub> = 0.0493,<br>wR <sub>2</sub> = 0.1264                               | R <sub>1</sub> = 0.0497,<br>wR <sub>2</sub> = 0.1138                               | R <sub>1</sub> = 0.0397,<br>wR <sub>2</sub> = 0.0577                                 |
| Largest diff. peak and<br>hole (e <sup>-</sup> Å <sup>-3</sup> ) | 2.124 and -0.795                                                                   | 1.210 and -1.053                                                                   | 0.552 and -0.583                                                                     |

<sup>‡</sup>Refinement method was full-matrix least-squares on F<sup>2</sup>; wavelength = 0.71073 Å. R<sub>1</sub> = Σ||F<sub>o</sub>|-|F<sub>c</sub>||/Σ|F<sub>o</sub>|; wR<sub>2</sub> = {Σ[w(F<sub>o</sub><sup>2</sup>-F<sub>c</sub><sup>2</sup>)<sup>2</sup>]/Σ[w(F<sub>o</sub><sup>2</sup>)<sup>2</sup>]}<sup>1/2</sup>. <sup>§</sup>Compound **3** was refined as an inversion twin.

**Table S2.** Crystallographic data and refinement parameters for compounds **4** and **7**.<sup>‡</sup>

| <b>Compound</b>                                     | <b>4</b>                                                                                         | <b>7</b>                                                                                                        |
|-----------------------------------------------------|--------------------------------------------------------------------------------------------------|-----------------------------------------------------------------------------------------------------------------|
| Empirical formula                                   | C <sub>21</sub> H <sub>29</sub> NC <sub>12</sub> O <sub>12</sub> P <sub>3</sub> Ru               | C <sub>22</sub> H <sub>44</sub> N <sub>3</sub> CoF <sub>6</sub> O <sub>18</sub> P <sub>3</sub> RuS <sub>2</sub> |
| Formula weight (g/mol)                              | 690.31                                                                                           | 802.54                                                                                                          |
| Temperature (K)                                     | 98(2)                                                                                            | 298(2)                                                                                                          |
| Crystal system,<br>space group                      | Monoclinic<br><i>P</i> 2 <sub>1</sub> / <i>c</i>                                                 | Monoclinic<br><i>Cc</i>                                                                                         |
| Unit cell dimensions<br>(Å, deg)                    | <i>a</i> = 10.4496(16)<br><i>b</i> = 11.5244(17)<br><i>c</i> = 22.855(4)<br><i>β</i> = 97.413(3) | <i>a</i> = 20.084(3)<br><i>b</i> = 12.6011(17)<br><i>c</i> = 16.863(2)<br><i>β</i> = 93.902(2)                  |
| Volume (Å <sup>3</sup> )                            | 2729.3(7)                                                                                        | 4257.8(10)                                                                                                      |
| Z                                                   | 4                                                                                                | 4                                                                                                               |
| Calculated density<br>(g/cm <sup>3</sup> )          | 1.802                                                                                            | 1.669                                                                                                           |
| Absorption coefficient<br>(mm <sup>-1</sup> )       | 1.399                                                                                            | 1.050                                                                                                           |
| F(000)                                              | 1496                                                                                             | 2172                                                                                                            |
| Crystal size (mm)                                   | 0.18 × 0.17 × 0.10                                                                               | 0.50 × 0.44 × 0.30                                                                                              |
| Θ range                                             | 1.965 to 25.500°                                                                                 | 3.453 to 25.049°                                                                                                |
| Limiting indices                                    | -12 ≤ <i>h</i> ≤ 7,<br>-13 ≤ <i>k</i> ≤ 13,<br>-23 ≤ <i>l</i> ≤ 27                               | -23 ≤ <i>h</i> ≤ 23,<br>-13 ≤ <i>k</i> ≤ 15,<br>-20 ≤ <i>l</i> ≤ 20                                             |
| Reflections collected /<br>unique                   | 36848 / 5033<br>[R <sub>int</sub> = 0.0759]                                                      | 12678 / 6982<br>[R <sub>int</sub> = 0.0473]                                                                     |
| Completeness to Θ                                   | 99.3%                                                                                            | 99.1%                                                                                                           |
| Absorption correction                               | multi-scan ABSCOR                                                                                | multi-scan ABSCOR                                                                                               |
| Min. and max<br>transmission                        | 0.430 and 1.000                                                                                  | 0.449 and 1.000                                                                                                 |
| Data / restraints /<br>parameters                   | 5033 / 0 / 328                                                                                   | 6982 / 2 / 517                                                                                                  |
| Goodness-of-fit on F <sup>2</sup>                   | 1.058                                                                                            | 1.000                                                                                                           |
| Final R indices<br>[I > 2σ(I)]                      | R <sub>1</sub> = 0.0478,<br>wR <sub>2</sub> = 0.1212                                             | R <sub>1</sub> = 0.0485,<br>wR <sub>2</sub> = 0.1222                                                            |
| R indices (all data)                                | R <sub>1</sub> = 0.0515,<br>wR <sub>2</sub> = 0.1258                                             | R <sub>1</sub> = 0.0493,<br>wR <sub>2</sub> = 0.1236                                                            |
| Largest diff. peak and<br>hole (e·Å <sup>-3</sup> ) | 1.291 and -1.788                                                                                 | 0.696 and -0.836                                                                                                |

<sup>‡</sup>Refinement method was full-matrix least-squares on F<sup>2</sup>; wavelength = 0.71073 Å. R<sub>1</sub> =  $\sum |F_o| - |F_c| / \sum |F_o|$ ; wR<sub>2</sub> =  $\{\sum [w(F_o^2 - F_c^2)^2] / \sum [w(F_o^2)]\}^{1/2}$ .
